# Supplementary material for: IECata: Interpretable bilinear attention network and evidential deep learning improve the catalytic efficiency prediction of enzymes
Source: Research Square preprint supplement (doi:10.21203/rs.3.rs-5583389/v1), 2025-03-19
Supplement: Supplementary file 1 [file d1d9f8a6478409e98a1a46ab.docx]

# IECata: Interpretable bilinear attention network and evidential deep learning improve the catalytic efficiency prediction of enzymes

Jingjing Wang a, **†**, Yanpeng Zhaob, c, **†**, Zhijiang Yang a, Ge Yao a, Penggang Han a, Jiajia Liu a, Chang Chen a, Peng Zhanc, *****, Xiukun Wan a, *****, Xiaochen Bob, *, Hui Jiang a, *****

____________

The authors state no conflict of interest.

**†** These authors contributed equally to this work.

a State Key Laboratory of NBC Protection for Civilian, Beijing, 102205, China

b Academy of Military Medical Sciences, Beijing, 100039, China

c School of Medicine, Shanghai University, Shanghai, 200444, China

* Corresponding authors.

E-mail addresses: zanpeng@shu.edu.cn (P. Zhan), xiukunwan@126.com (X. Wan), boxiaoc@163.com; boxc@bmi.ac.cn (X. Bo), ylplkmc@163.com; jiangtide@sina.cn (H. Jiang).**Model evaluation**

To comprehensively evaluate the predictive performance of the IECata regression model, we used four metrics: Pearson coefficient (PCC), R-squared (R2), mean absolute error (MAE), and root mean square error (RMSE).

|  |  | (1) |
| --- | --- | --- |
|  |  | (2) |
|  |  | (3) |
|  |  | (4) |

Where,are the experimental and predicted *k*cat / *K*m values, respectively.andare the average of the experimental and predicted *k*cat / *K*m values, respectively. is the number of entries in the datasets.

Additionally, hit ratio (HR) was used to measure the proportion of enzyme-directed evolution data correctly predicted by IECata.

|  |  | (5) |
| --- | --- | --- |

is the number of samples. whether the predicted labels match the true labels in enzyme-directed evolution dataset. If yes, its value is 1, else it is 0.


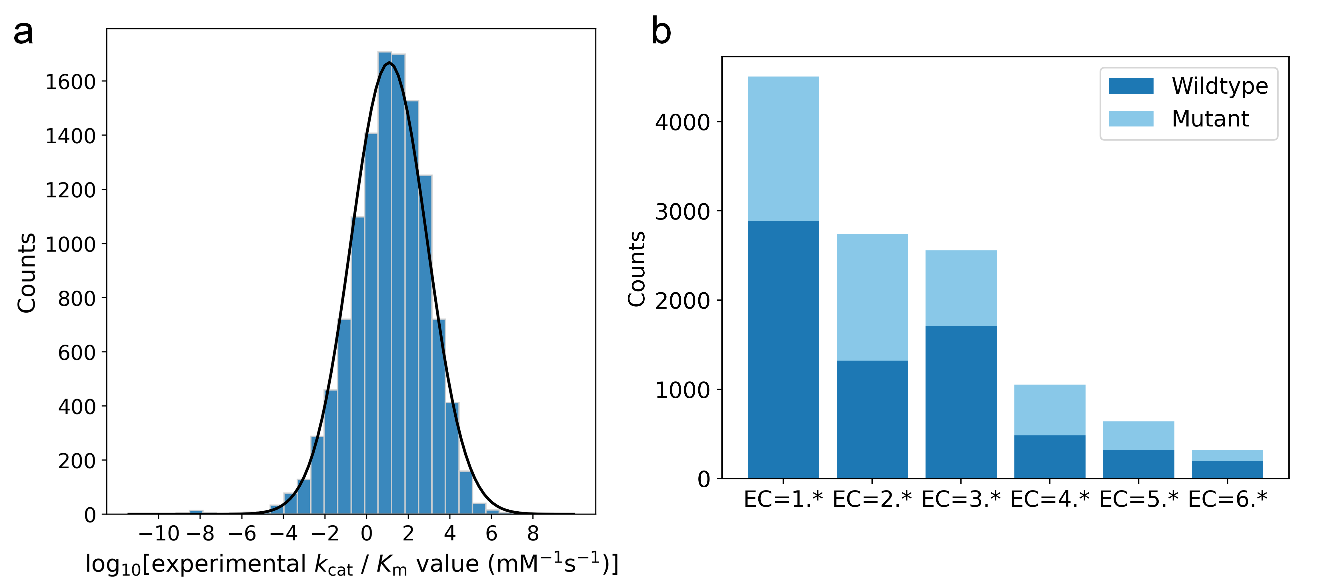


**Fig. S1.** Data analysis of the whole IECata dataset. **a** Data distribution of all *k*cat / *K*m values. **b** Classification of enzyme typesbased on the first digit of EC number, and the distribution of wildtype and mutant enzymes for each type of enzyme. Source data are provided as a Source Data file.


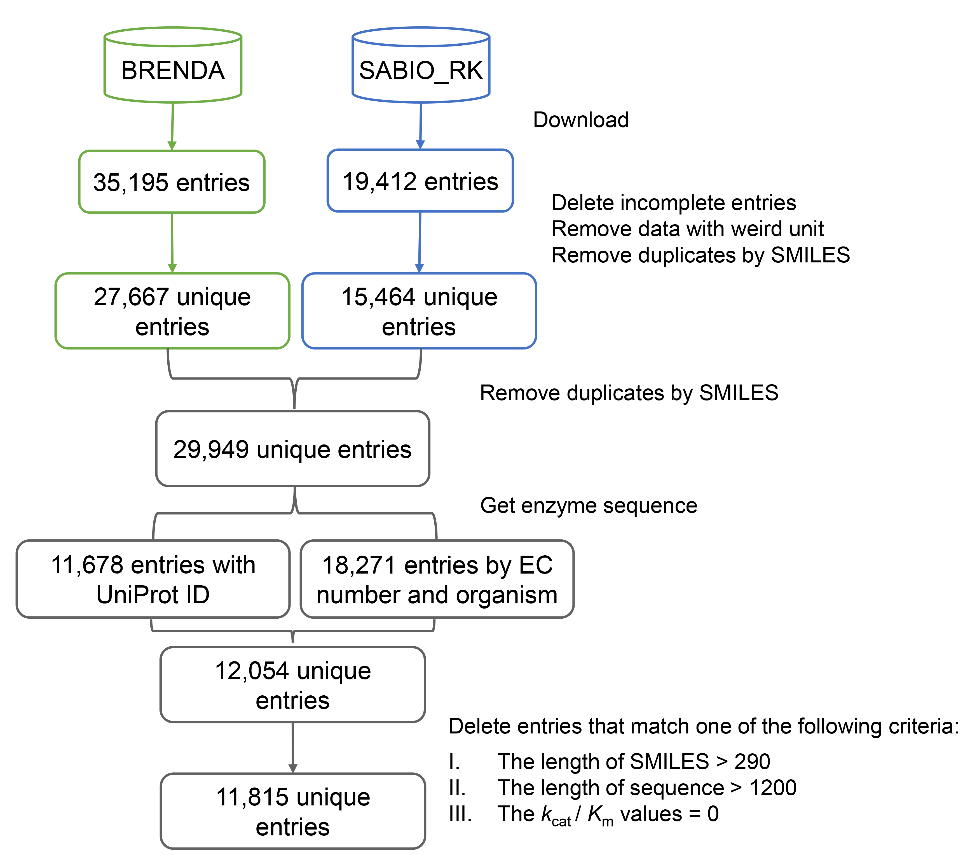


**Fig. S2**. The collection and processing workflow of the IECata dataset.

**Table S1** Comparison of IECata and UniKP datasets

| *k*cat / *K*m datasets | IECata | UniKP |
| --- | --- | --- |
| Entries | 11,815 | 910 |
| Unique enzyme sequences | 5,350 | 321 |
| Unique Enzyme Classes (EC) | 1,279 | NA |
| Unique substrates | 2,113 | 452 |
| Unique organisms | 901 | NA |

**Table S2** Hyperparameters settings for the IECata model. The final hyperparameters are indicated in bold

| Parameters | Values |
| --- | --- |
| Regularization coefficient | 0.005, 0.01, 0.1, 0.15, **0.2**, 0.25, 0.3, 0.4, 0.5 |
| Epoch | 80, 85, 90, 95, **100**, 110, 120, 130, 140, 150 |
| Batch | 16, 32, **64**,128, 256 |
| Optimizer | **Adam** |
| Learning rate | 1e-5, 5e-5, 5e-4, 6e-4, 7e-4, **8e-4**, 1e-3, 5e-3 |
| Weight_decay by StepLR | **Step 30, Gamma 0.5**  Step 25, Gamma 0.5  Step 20, Gamma 0.5 |
| Dropout | 0.1, 0.15, **0.2**, 0.3, 0.35, 0.4 |
| Enzyme feature convolution kernel size | **9** |
| Enzyme attention convolution kernel size | **9** |
| Enzyme readout MLP layers | **1** |
| Enzyme readout MLP hidden dimension | 64, **128**, 256 |
| Substrate GCN layers | 2, **3**, 4 |
| Substrate GCN hidden dimension | [64, 64,64]  **[128,128,128]**  [256,256,256] |
| Enzyme substrate pair readout MLP layers | **4** |
| Enzyme substrate pair readout MLP hidden Dimension | **[256,512,128,4]**  [256,256,128,4]  [256,128,128,4]  [512,256,128,4] |
